# Supplementary material
Source: Research Square preprint supplement (doi:10.21203/rs.3.rs-9413884/v1)
Supplement: Supplementary file 1 [file 5a5f81a4804e710a0d324a62.pdf]

## Reporting Summary

Nature Portfolio wishes to improve the reproducibility of the work that we publish. This form provides structure for consistency and transparency in reporting. For further information on Nature Portfolio policies, see our [Editorial Policies](#) and the [Editorial Policy Checklist](#).

### Statistics

For all statistical analyses, confirm that the following items are present in the figure legend, table legend, main text, or Methods section.

n/a Confirmed

- The exact sample size ( $n$ ) for each experimental group/condition, given as a discrete number and unit of measurement
- A statement on whether measurements were taken from distinct samples or whether the same sample was measured repeatedly
- The statistical test(s) used AND whether they are one- or two-sided  
*Only common tests should be described solely by name; describe more complex techniques in the Methods section.*
- A description of all covariates tested
- A description of any assumptions or corrections, such as tests of normality and adjustment for multiple comparisons
- A full description of the statistical parameters including central tendency (e.g. means) or other basic estimates (e.g. regression coefficient) AND variation (e.g. standard deviation) or associated estimates of uncertainty (e.g. confidence intervals)
- For null hypothesis testing, the test statistic (e.g.  $F$ ,  $t$ ,  $r$ ) with confidence intervals, effect sizes, degrees of freedom and  $P$  value noted  
*Give  $P$  values as exact values whenever suitable.*
- For Bayesian analysis, information on the choice of priors and Markov chain Monte Carlo settings
- For hierarchical and complex designs, identification of the appropriate level for tests and full reporting of outcomes
- Estimates of effect sizes (e.g. Cohen's  $d$ , Pearson's  $r$ ), indicating how they were calculated

*Our web collection on [statistics for biologists](#) contains articles on many of the points above.*

### Software and code

Policy information about [availability of computer code](#)

Data collection

Data analysis

For manuscripts utilizing custom algorithms or software that are central to the research but not yet described in published literature, software must be made available to editors and reviewers. We strongly encourage code deposition in a community repository (e.g. GitHub). See the Nature Portfolio [guidelines for submitting code & software](#) for further information.

### Data

Policy information about [availability of data](#)

All manuscripts must include a [data availability statement](#). This statement should provide the following information, where applicable:

- Accession codes, unique identifiers, or web links for publicly available datasets
- A description of any restrictions on data availability
- For clinical datasets or third party data, please ensure that the statement adheres to our [policy](#)

All datasets will be made available to the community through the Tumor Profiler data portal, enabling further exploration and reuse. Referees can access all of the data securely at this repository:

<https://www.tumorprofiler.com/resources/melanoma/>

Username: reviewer

Password: \_tupro\_2025

Upon publication, they will be made openly available to the research community.

## Research involving human participants, their data, or biological material

Policy information about studies with [human participants or human data](#). See also policy information about [sex, gender \(identity/presentation\), and sexual orientation](#) and [race, ethnicity and racism](#).

|                                                                    |                                                                                                                                                                                                                          |
|--------------------------------------------------------------------|--------------------------------------------------------------------------------------------------------------------------------------------------------------------------------------------------------------------------|
| Reporting on sex and gender                                        | The sex of the patients is reported, and efforts were taken to balance the cohort to ensure equal representation of the sex of the patients.                                                                             |
| Reporting on race, ethnicity, or other socially relevant groupings | Race, ethnicity, or other socially relevant groupings were not used as inclusion criteria for the study and were not analyzed as independent variables.                                                                  |
| Population characteristics                                         | The clinical and patient-level description of the cohort was analyzed and published recently in Nature Medicine: DOI <a href="https://doi.org/10.1038/s41591-025-03715-6">https://doi.org/10.1038/s41591-025-03715-6</a> |
| Recruitment                                                        | Patients were recruited from two University Hospitals in Switzerland (Zürich and Basel), as part of the routine care of patients and according to                                                                        |
| Ethics oversight                                                   | <i>Identify the organization(s) that approved the study protocol.</i>                                                                                                                                                    |

Note that full information on the approval of the study protocol must also be provided in the manuscript.

## Field-specific reporting

Please select the one below that is the best fit for your research. If you are not sure, read the appropriate sections before making your selection.

Life sciences       Behavioural & social sciences       Ecological, evolutionary & environmental sciences

For a reference copy of the document with all sections, see [nature.com/documents/nr-reporting-summary-flat.pdf](https://nature.com/documents/nr-reporting-summary-flat.pdf)

## Life sciences study design

All studies must disclose on these points even when the disclosure is negative.

|                 |                                                                                                                                                                                                                                                                                                                                                                 |
|-----------------|-----------------------------------------------------------------------------------------------------------------------------------------------------------------------------------------------------------------------------------------------------------------------------------------------------------------------------------------------------------------|
| Sample size     | This was a translational study based on all of the samples collected from the recently published clinical study in Nature Medicine: DOI <a href="https://doi.org/10.1038/s41591-025-03715-6">https://doi.org/10.1038/s41591-025-03715-6</a> No additional sample size calculation was performed, because all available samples were analyzed from 124 patients. |
| Data exclusions | No data were excluded from the analysis. Sample drop-outs resulted from the application of stringent quality control metrics in the original histopathological analysis in which samples had to have >50% tumor content and enough cells to perform downstream analyses.                                                                                        |
| Replication     | All attempts at replication were successful and were included in a blinded robustness test across all technological platforms.                                                                                                                                                                                                                                  |
| Randomization   | There was no interventional randomization, as this was not a clinical study.                                                                                                                                                                                                                                                                                    |
| Blinding        | Investigators were blinded at the point of sample collection and analysis.                                                                                                                                                                                                                                                                                      |

## Reporting for specific materials, systems and methods

We require information from authors about some types of materials, experimental systems and methods used in many studies. Here, indicate whether each material, system or method listed is relevant to your study. If you are not sure if a list item applies to your research, read the appropriate section before selecting a response.

## Materials &amp; experimental systems

- n/a Involved in the study
- Antibodies
- Eukaryotic cell lines
- Palaeontology and archaeology
- Animals and other organisms
- Clinical data
- Dual use research of concern
- Plants

## Methods

- n/a Involved in the study
- ChIP-seq
- Flow cytometry
- MRI-based neuroimaging

## Antibodies

- Antibodies used
- Validation

## Clinical data

Policy information about [clinical studies](#)

All manuscripts should comply with the ICMJE [guidelines for publication of clinical research](#) and a completed [CONSORT checklist](#) must be included with all submissions.

- Clinical trial registration
- Study protocol
- Data collection
- Outcomes

## Plants

- Seed stocks
- Novel plant genotypes
- Authentication
